# Supplementary material for: MSGene: Derivation and validation of a multistate model for lifetime risk of coronary artery disease using genetic risk and the electronic health record
Source: PubMed Central journal article supplement — medRxiv. 2023 Nov 8:2023.11.08.23298229. Preprint. [Version 1] doi: 10.1101/2023.11.08.23298229 (PMC10659503; doi:10.1101/2023.11.08.23298229), 2023-11-08
Supplement: media-2.pdf [file media-2.pdf]

1 **Supplementary Materials for *MSGene: Derivation and validation of a multistate model for***  
2 *lifetime risk of coronary artery disease using genetic risk and the electronic health record*

3 **Urbut et al.**

4 1. Supplemental Tables and supporting information (PDF file format)

5 2. Supplemental Figures and Figure Legends (PDF file format)

6 3. Additional Supplementary Materials

7

8

9 **Supplementary Tables**

10

11 **Supplementary Table 1**

12 **Supplementary Tables 2-16 in the Excel document**

13

14

|                                                                  | Health      |              | Hypertension |              | Diabetes Mellitus |              | Hyperlipidemia |              |
|------------------------------------------------------------------|-------------|--------------|--------------|--------------|-------------------|--------------|----------------|--------------|
| <b>RMSE (SD)</b>                                                 | MSGene Ten  | MSGene Life  | MSGene Ten   | MSGene Life  | MSGene Ten        | MSGene Life  | MSGene Ten     | MSGene Life  |
| Sex + PRS                                                        | 0.59 (0.03) | 2.24 (0.06)  | 1.47 (0.07)  | 6.44 (0.23)  | 4.02 (0.18)       | 8.99 (0.3)   | 3.46 (0.17)    | 9.93 (0.36)  |
| Sex + PRS+Smoking (RMSE (%))                                     | 0.61 (0.03) | 2.34 (0.07)  | 1.48 (0.07)  | 6.53 (0.23)  | 4.10 (0.19)       | 9.40 (0.31)  | 3.49 (0.17)    | 10.05 (0.36) |
| Sex + PRS+Smoking+ Antihypertensive                              | 0.68 (0.03) | 1.34 (0.05)  | 1.46 (0.07)  | 6.33 (0.23)  | 3.96 (0.19)       | 8.51 (0.30)  | 3.31 (0.16)    | 8.58 (0.31)  |
| Sex + PRS+ Smoking+ Statin                                       | 0.74 (0.04) | 1.13 (0.03)  | 1.36 (0.07)  | 5.10 (0.16)  | 3.93 (0.18)       | 9.15 (0.31)  | 3.49 (0.17)    | 9.83 (0.35)  |
| Sex + PRS+ Smoking+ Antihypertensive + Statin                    | 0.86 (0.05) | 1.06 (0.04)  | 1.36 (0.07)  | 5.4 (0.17)   | 3.93 (0.19)       | 8.65 (0.30)  | 3.33 (0.16)    | 9.01 (0.32)  |
| Pooled Cohort Equation                                           | 6.12 (0.32) |              | 6.74 (0.37)  |              | 10.93 (0.54)      |              | 7.03 (0.34)    |              |
| Pooled Cohort Equation (restricted to individuals at enrollment) | 6.08 (0.31) |              | 7.10 (0.36)  |              | 7.25 (0.37)       |              | 7.10 (0.35)    |              |
| FRS30 Year <sup>15</sup>                                         |             | 33.60 (0.75) |              | 37.45 (0.83) |                   | 42.67 (0.82) |                | 35.91 (0.87) |
| FRS30 Year Recalibrated                                          |             | 10.91 (0.26) |              | 12.25 (0.34) |                   | 16.76 (0.46) |                | 12.58 (0.4)  |

15

16 **Supplementary Table 1: RMSE (%) of limited grid search for model fit**

17 Above, we demonstrate the RMSE of each model using a set of covariates comparable to  
 18 existing risk stratification algorithms for individuals for prediction over ages 40-70. Each RMSE  
 19 is averaged over a set of sex, genetic and age strata, as described in text. We provide SEM for  
 20 RMSE across strata. We compare the Pooled Cohort Equation (PCE) ten-year risk for  
 21 individuals using baseline parameters with continuously updated ages as in the original 30 year  
 22 validation study<sup>15</sup>, and to a restricted set of individuals who contribute baseline parameters at  
 23 age of enrollment considered. This technique was used in the development of the initial  
 24 Framingham 30-year score in 2009: namely, using baseline values of covariates and updated  
 25 age to calculate risk in a model requiring these covariates. For FRS 30 year we also use the  
 26 baseline values of systolic blood pressure, high-density lipoprotein and total cholesterol, with  
 27 updated ages<sup>15</sup> and for the recalibrated calculation, we recalibrate the prediction using the mean  
 28 values of covariates at baseline and the population baseline hazard as in published<sup>16</sup>  
 29 recalibration.

30 **FRS30**: Framingham 30 year, **FRS30 Recalibrated**: Framingham 30 recalibrated, **SEM**:  
 31 standard error of mean.  
 32

33 **Supplementary Figure Legends**

34

35 **Supplementary Figure 1: Summary of GP and non-GP members**

36 Above, we demonstrate the homogeneity of phenotyping age and proportions among individuals  
37 within and outside of the GP (general practice) cohort. We use approximately 80% (385,541)  
38 individuals in the training, and 79,119 in the testing set, of which approximately 45% represent  
39 members of the general practice primary care data.

40

41 **Supplementary Figure 2. Comparison to ten-year pooled cohort equations**

42 **A.** We display the proportion of cases captured using a pooled-cohort equation (PCE) threshold  
43 of 5%, a lifetime threshold of 10% as computed by MSGene, or both. At age 40, 58% of  
44 individuals who ultimately develop CAD demonstrate an MSGene lifetime threshold greater than  
45 10% while less than 1.3% demonstrate a PCE 10-year threshold than 5% alone. **B.** The net  
46 proportion of events (NRI case) detected by a lifetime score exceeds that of a 10-year score at  
47 age 40 and the net proportion of non-events exceeds that of a 10-year measure after age 60.  
48 Median NRI over the 40-year period is 12.2% (5.4%–18.6%) **C.** High lifetime risk individuals not  
49 captured by the 10-year equation are enriched in high-genomic risk. After age 68, there are no  
50 individuals with lifetime score over 10% who lack a short term risk greater than 5%.

51

52 **PCE:** pooled cohort equations, **PRS:** polygenic risk score, **NRI:** net reclassification index.

53

54 **Supplementary Figure 3: Overall Calibration from health state.**

55 We display the RMSE (SEM) between predicted and realized risk for individuals starting in the  
56 healthy state by sex and genetic risk level as categorized low (<20%), mid (20-80%) and high  
57 (>80%). We also compare to the Framingham 30-year score (FRS30) and Framingham 30-year  
58 score after recalibration (FRS30RC). Here the standard errors represent the standard deviation  
59 in calibration across age, sex and genetic categories for a given score to demonstrate variability  
60 in performance across categories.

61

62 **RMSE:** Root mean squared error, **FRS:** Framingham 30-year risk score. **FRS30RC:**  
63 (recalibrated). **SEM:** Standard error of mean

64

65 **Supplementary Figure 4: Analyses using the first-age at which threshold surpassed**  
66 **using GP cohort alone.**

67 Using only the individuals in the GP cohort for testing and training, we consider the distribution  
68 of the first age at which an individual exceeds the PCE-derived ten year threshold of 5%, or  
69 lifetime threshold or 10% using FRS30RC (**B**) or the MSGene lifetime prediction (**C**). We then  
70 use this age as a time dependent predictor of time to event in a time-dependent cox PH  
71 in which an individual's time followed is stratified by start time and periods in which a threshold is  
72 passed, and final censoring time with an indicator variable demarcating whether or not each  
73 threshold has been surpassed. We report Harrell's C-index ( $p < 2e-16$ ) for discrimination on how  
74 well a model predicts events that tend to occur earlier versus later. CI calculated over 100  
75 bootstrapping intervals of expanded data set.

76

77 **FRS30RC:** Framingham 30-year recalibrated. **PCE:** Pooled Cohort equations. **GP:** General  
78 Practice cohort.

79

80 **Supplementary Figure 5: Analysis of time-to-event discrimination using the GP cohort**  
81 **alone.**

82 Using only the individuals in the GP cohort for testing and training, we use continuously updated  
83 predictions assembled combining age-specific state status information with state-specific model  
84 predictions, as in the primary analysis featured in main Figure 6. We show that the C index  
85 using MSGene updated estimates exceeds that of using the FRS30RC score ( $p < 2e-16$ ). CI  
86 calculated over 100 bootstrapping intervals of expanded data set.

87  
88 **FRS30RC:** Framingham 30-year recalibrated. **GP:** general practice cohort.

### 89 **Supplementary Figure 6: AUC-ROC**

91 We report the area under the receiver operating curve (ROC) predicting remaining lifetime risk  
92 using empirical data as the gold standard. We dynamically update the age along the x axis and  
93 compare to FRS30, FRS30RC, or PRS alone. We also display the precision recall curve, which  
94 accounts for class distribution changes over the life course. Here we report the ROC for the  
95 transition from health to CAD. Standard deviation represents the square root of the variance of  
96 the ROC estimate using pROC (version 1.17.4).

97  
98 **FRS30:** Framingham Risk Score 30year, **FRS30RC:** Framingham Risk Score 30year  
99 Recalibrated, **AUC-ROC:** Area under the receiver operator curve; **AUC-PRC:** Area under the  
100 Precision recall curve.

### 101 **Supplementary Figure 7: Unique individuals identified.**

103 Comparison of individuals identified at each age by an MSGene lifetime score (using a  
104 threshold of 10%) only or by FRS30RC (**A**), PCE (**B**) or MSGene marginally. We note that after  
105 age 70, there are no individuals identified by MSGene who are not also identified by the PCE or  
106 FRS30RC metric owing to the specificity of MSGene.

107  
108 **FRS30RC:** Framingham 30 year recalibrated, **PCE:** Pooled Cohort equations.

### 109 **Supplementary Figure 8: Framingham Offspring Cohort**

110 Using the Framingham Offspring cohort (FOS), we isolate individuals with genotype information  
111 available for polygenic risk scoring and use values at first measurement to compute predicted  
112 30-year score and MSGene lifetime score. We compare with the score based on training values  
113 computed using the UKB EHR and calculate RMSE and ROC-AUC. In (**B**), we describe the  
114 cohort over a median of 38.4 years (IQR 4.1) years of follow up. Low genomic risk connotes  
115 individuals in the lowest (<20%) of genomic risk by PRS percentile, intermediate (20-80%) PRS  
116 percentile, and high denotes >80% PRS percentile. Given the size of the cohort, we report age-  
117 specific AUC for 5-year age intervals.

118  
119 **FOS:** Framingham Heart Study Offspring Cohort, **CAD:** coronary artery disease, **PRS:**  
120 Polygenic Risk score. **Pheno:** phenotyped outcomes, **RMSE:** Root Mean Squared Error, **AUC:**  
121 Area under the receiver operating curve.

### 122 **Supplementary Figure 9: External Validation**

124 We compute the root mean squared error (RMSE) and AUC-ROC curve for prediction for all  
125 individuals in the FOS cohort using MSGene lifetime prediction and FRS 30 in blue. Given the  
126 limited number of individuals we report across all individuals rather than by age and sex  
127 category. B) We compute the area under the ROC curve using an MSGene score for individuals  
128 starting at ages 40, 45, 50 or 55 in the FOS and compare with computed FRS30 score on 30

129 years of follow-up data, given that we compare with the original FRS 30-year score (calibrated  
130 on this population).

131 **FOS**: Framingham Offspring Cohort; **MSLife**: MSGene Lifetime evaluation; **FRS30**:  
132 Framingham 30-year score (original), **AUC=ROC**: area under receiver operator curve.

### 133 134 **Supplementary Figure 10: Interactive application for lifetime risk reduction**

135 Using our interactive application, patient's and clinicians can visualize the estimated risk  
136 trajectory based on starting CAD and covariate profile and adjust for treatment start time,  
137 changing covariate profile, and changing state. The app can be accessed at  
138 <https://surbut.github.io/risk>.

### 139 140 **Supplementary Figure 11: Model fit attempt using baseline covariates.**

141 We look at the estimated coefficients over 40 years of prediction for a model including baseline  
142 covariates and see that the coefficient for these values approaches after inclusion of  
143 hypertension and hyperlipidemia in a multistate approach. Given the further limitations of  
144 obtaining accurate levels of these covariates at regular intervals in an observational cohort, we  
145 choose a model that uses risk factors as opposed to individual laboratory measurements.

146  
147 **CAD-PRS**: Polygenic risk score, **Anti-hypertensive use**: time-dependent antihypertensive use;  
148 **Statin Use**: time dependent statin use; **HDL-C**: HDL cholesterol; **SBP**: systolic blood-pressure.

### 149 150 **Supplementary Figure 12: Mapping the life course using EHR data**

151 In **A**, we demonstrate the data encountered across modalities of the UKB EHR data for a  
152 sample individual with periods of data observation from 1990 through the present who had an  
153 MI in 2013 at age 57. In **B**, for a different individual, we demonstrate the use of diagnostic code  
154 assemblies from a variety of sources including touchscreen (**TS**), self report (**f.20002**), primary  
155 care (**CTV3**) and HESIN<sup>17</sup> (**ICD10**) to define phenotypes of interest. This patient enters our  
156 study at first interaction with GP record in 1995 and is characterized in the hypertensive risk  
157 category. He is then later diagnosed with CAD in 2012. **C**. We show the density of first reported  
158 encounter with the primary care atlas for individuals within the UKB. Peak density between  
159 1980-1987.

160 **TS**: Touchscreen; **f.20002**: Self-report, **CTV3**: primary care, **ICD10**: International Consortium on  
161 Disease. **CAD**: coronary artery disease. **EHR**: Electronic Health Record.

### 162 163 **Supplementary Figure 13: Availability of phenotype by data source**

164  
165 Above, for the states of interest, we demonstrate the enrichment by data source for categories  
166 of codes recorded that inform our phenotyping algorithm. In general, across categories and  
167 phenotypes, diagnoses begin in 1940 and exceed 1000 diagnoses by 1980. Plots generated  
168 using the ukbpheno package Version 1.0.<sup>18</sup>

169 **Ts**=Touchscreen, **HESIN**: Hospitalization index data, **sr**: self report, **tte**: time to event,  
170 **gpclinical**: general practice clinical data.

### 171 172 **Supplementary Figure 14: Alignment of phenotypes**

173 Above, we demonstrate the concordance of phenotype data between the diagnoses assembled  
174 using the UKBPheno package<sup>18</sup> across GP and HESIN codes, and with our previously  
175 published<sup>9,19,20</sup> laboratory data.

176 **Lab**: previously published phenotypes. **UKBPheno**: using the **UKBpheno** atlas.

177

178 **Supplementary Figure 15: PRS-Distribution by Age at Enrollment in UKB**

179 We demonstrate the distribution of genomic risk (PRS) by age of enrollment. In general, there  
180 exists no bias between individuals who enroll at early or late ages by genomic risk quintile ( $p =$   
181  $0.28$ , Anderson Darling for difference in distribution).

182 **PRS:** Polygenic Risk Score for CAD. **UKB:** UK Biobank.

183

184 **Supplementary Figure 16: RMSE using MSGene versus FRS30**

185 Here, we show the RMSE overall (SEM) compared to the FRS30 year score without calibration  
186 **(A)**, FRS30RC, with calibration according to Rospleszcz et al<sup>16</sup> **(B)** Given that recalibration is  
187 not guaranteed to preserve the overall incidence in the population, we also performed a  
188 sensitivity analysis in which we further standardized to reflect average predictions in line with  
189 overall incidence<sup>34</sup> and using an additional division to match the overall incidence rate. This is  
190 for individuals progressing from the healthy state, with additional RMSE computed in  
191 supplementary table 1. In this paper, we discuss results using the traditional recalibration. In  
192 general, while further standardization improves overall RMSE, it increases the RMSE for  
193 younger individuals.

194 **RMSE:** Root mean squared error. **FRS30:** Framingham 30 year score. **FRS30 RC:** Framingham  
195 30 year with recalibration according to<sup>16</sup>, **FRS30 RC/div:** Framingham after further division to  
196 normalize overall incidence rate, in our data this was by 1.83 to normalize incidence rate to  
197 11.1% overall.

198

199 **Supplementary Figure 17: Smoothed Fit across ages.**

200 We consider the unsmoothed coefficients extracted for a sample model from Health to CAD  
201 over 40 years of follow-up. We show the smoothed coefficients (*'custom loess'*, here green)  
202 using our weighted least square regression that weights each state-state-age specific coefficient  
203 according to those within a 20-year range according to their distance and inverse variance.  
204 Here, we use polynomial degree 2, consider neighbors within 20 years and compare to a  
205 Standard loess fit (R package Stats, v 3.6.2) with span 0.75 and with (or without) weights  
206 according to inverse variance (*Standard LOESS weighted, unweighted*) for the transition from  
207 health to CAD. We provide this via a user interface: <https://surbut.shinyapps.io/testapp/>.  
208 **f.31.0.01:** sex; **anti-htn now:** time-dependent anti-hypertensive use, **CAD-PRS:** Polygenic risk  
209 score.

210

211

212

213

214

215

216

217

218

219

220

221

222

223

224

225

|                                 | <b>Not Member<br/>(N=259287)</b> | <b>Member<br/>(N=221351)</b> | <b>Overall<br/>(N=480638)</b> |
|---------------------------------|----------------------------------|------------------------------|-------------------------------|
| <b>Sex</b>                      |                                  |                              |                               |
| Female                          | 139975 (54.0%)                   | 120678 (54.5%)               | 260653 (54.2%)                |
| Male                            | 119312 (46.0%)                   | 100673 (45.5%)               | 219985 (45.8%)                |
| <b>Birthdate</b>                |                                  |                              |                               |
| Mean (SD)                       | 1950 (8.14)                      | 1950 (8.08)                  | 1950 (8.11)                   |
| Median [Min, Max]               | 1950 [1930, 1970]                | 1950 [1940, 1970]            | 1950 [1930, 1970]             |
| <b>Years Followed</b>           |                                  |                              |                               |
| Mean (SD)                       | 29.4 (8.06)                      | 29.5 (8.00)                  | 29.4 (8.03)                   |
| Median [Min, Max]               | 30.5 [0.375, 47.6]               | 30.6 [1.44, 44.5]            | 30.5 [0.375, 47.6]            |
| <b>Develop Hypertension</b>     |                                  |                              |                               |
| 0                               | 158197 (61.0%)                   | 131989 (59.6%)               | 290186 (60.4%)                |
| 1                               | 101090 (39.0%)                   | 89362 (40.4%)                | 190452 (39.6%)                |
| <b>Develop Coronary Disease</b> |                                  |                              |                               |
| No                              | 231094 (89.1%)                   | 196084 (88.6%)               | 427178 (88.9%)                |
| Yes                             | 28193 (10.9%)                    | 25267 (11.4%)                | 53460 (11.1%)                 |
| <b>Develop Diabetes</b>         |                                  |                              |                               |
| No                              | 234542 (90.5%)                   | 198400 (89.6%)               | 432942 (90.1%)                |
| Yes                             | 24745 (9.5%)                     | 22951 (10.4%)                | 47696 (9.9%)                  |
| <b>Develop Hyperlipidemia</b>   |                                  |                              |                               |
| No                              | 199488 (76.9%)                   | 167556 (75.7%)               | 367044 (76.4%)                |
| Yes                             | 59799 (23.1%)                    | 53795 (24.3%)                | 113594 (23.6%)                |
| <b>Current Smoker</b>           |                                  |                              |                               |
| No                              | 231921 (89.4%)                   | 198045 (89.5%)               | 429966 (89.5%)                |
| Yes                             | 27366 (10.6%)                    | 23306 (10.5%)                | 50672 (10.5%)                 |
| <b>Proportion White</b>         |                                  |                              |                               |
| Yes                             | 221475 (85.4%)                   | 95626 (88.4%)                | 417101 (86.8%)                |
| <b>Age Hypertension</b>         |                                  |                              |                               |
| Mean (SD)                       | 62.6 (11.2)                      | 61.9 (11.5)                  | 62.3 (11.3)                   |
| Median [Min, Max]               | 63.0 [0.433, 87.0]               | 62.5 [0.446, 84.3]           | 62.9 [0.433, 87.0]            |
| <b>Age CAD</b>                  |                                  |                              |                               |
| Mean (SD)                       | 67.7 (8.34)                      | 67.5 (8.40)                  | 67.6 (8.37)                   |
| Median [Min, Max]               | 68.5 [40.0, 87.0]                | 68.3 [40.0, 84.3]            | 68.5 [40.0, 87.0]             |
| <b>Age Diabetes</b>             |                                  |                              |                               |
| Mean (SD)                       | 67.4 (9.25)                      | 67.2 (9.29)                  | 67.3 (9.27)                   |
| Median [Min, Max]               | 68.6 [0.476, 87.0]               | 68.4 [0.465, 84.3]           | 68.5 [0.465, 87.0]            |
| <b>Age Hyperlipidemia</b>       |                                  |                              |                               |
| Mean (SD)                       | 65.9 (8.97)                      | 65.5 (9.08)                  | 65.7 (9.02)                   |
| Median [Min, Max]               | 66.2 [0.0137, 87.0]              | 65.7 [0.0465, 84.3]          | 66.0 [0.0137, 87.0]           |

226  
227  
228  
229

**Supplementary Figure 1.**

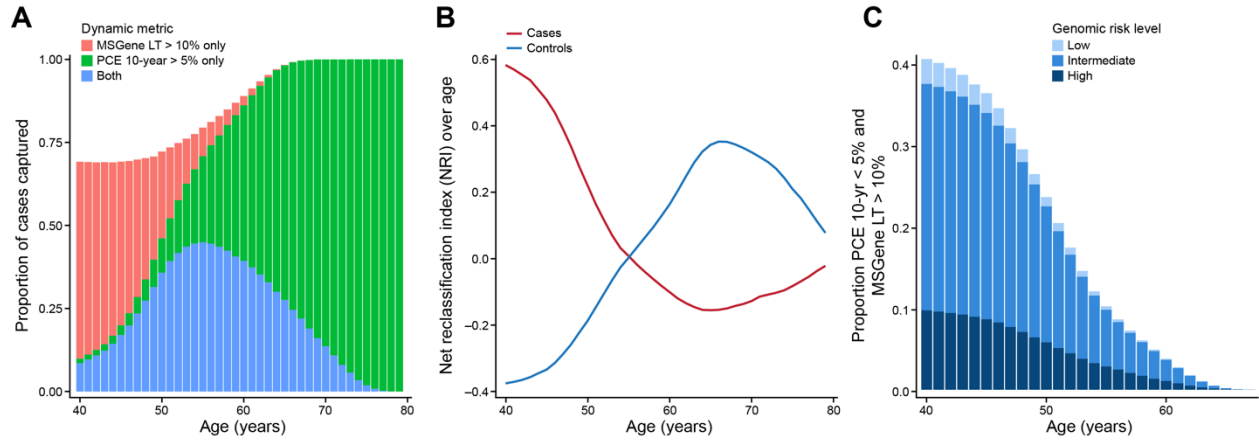

230  
231  
232  
233

**Supplementary Figure 2.**



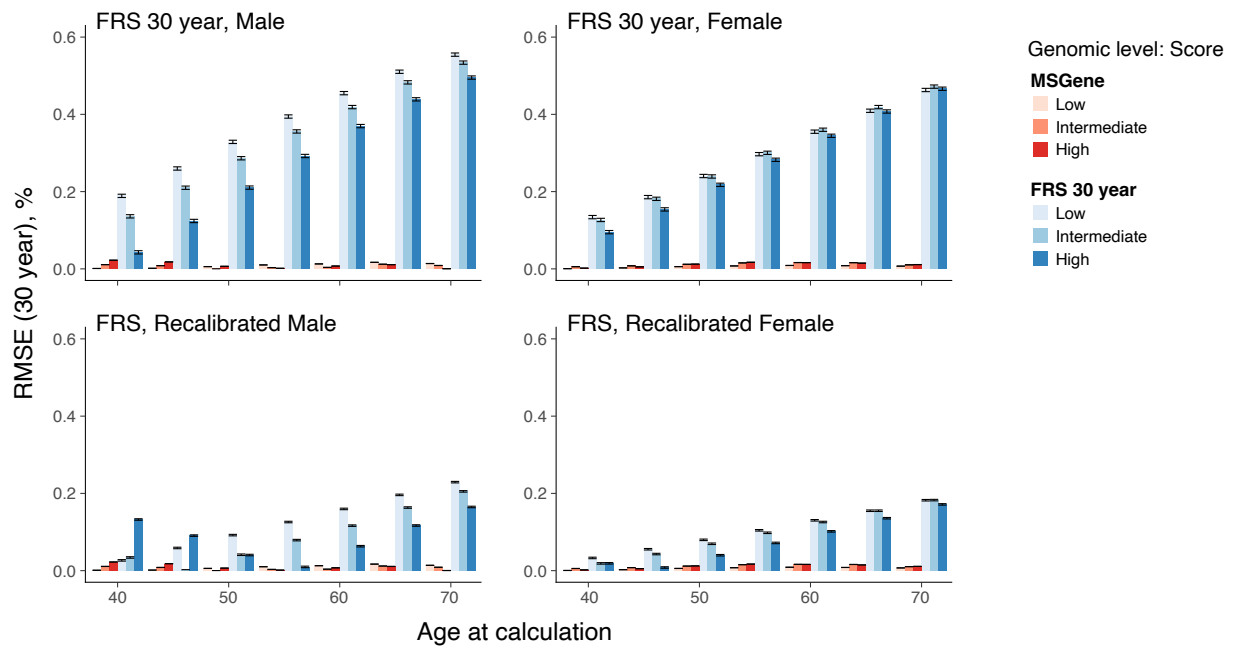

234  
235 **Supplementary Figure 3.**

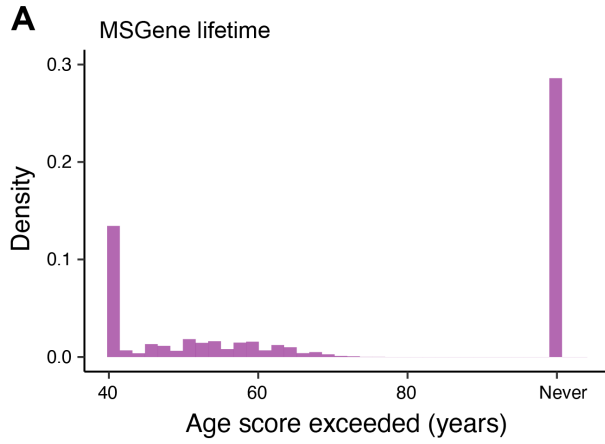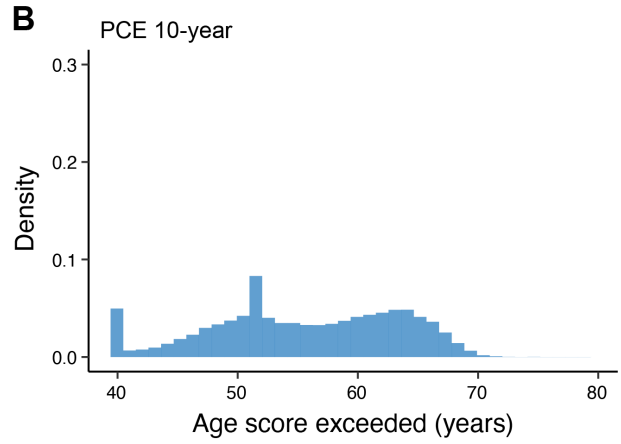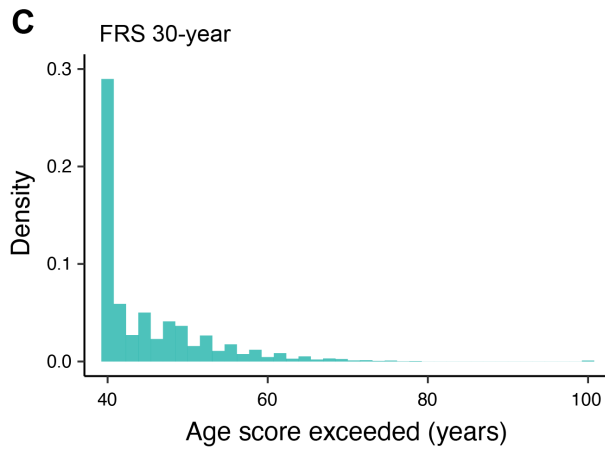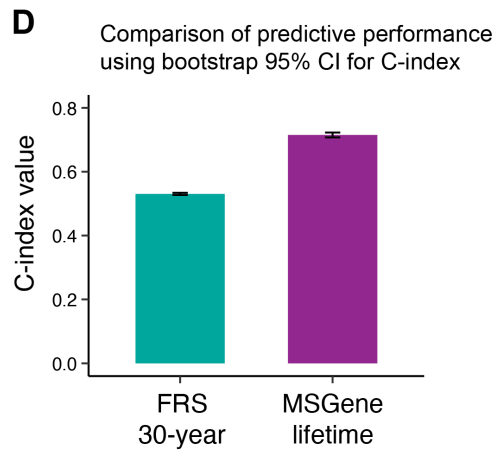

236  
237

**Supplementary Figure 4.**

238  
239

240

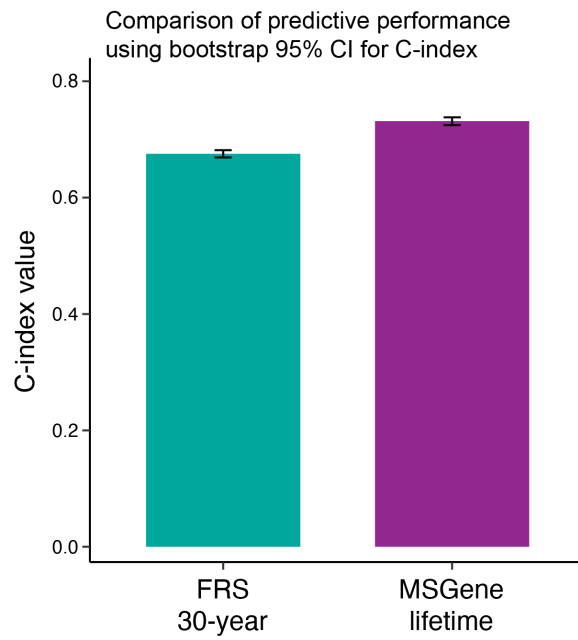

241

242

243

244

245

246

**Supplementary Figure 5.**

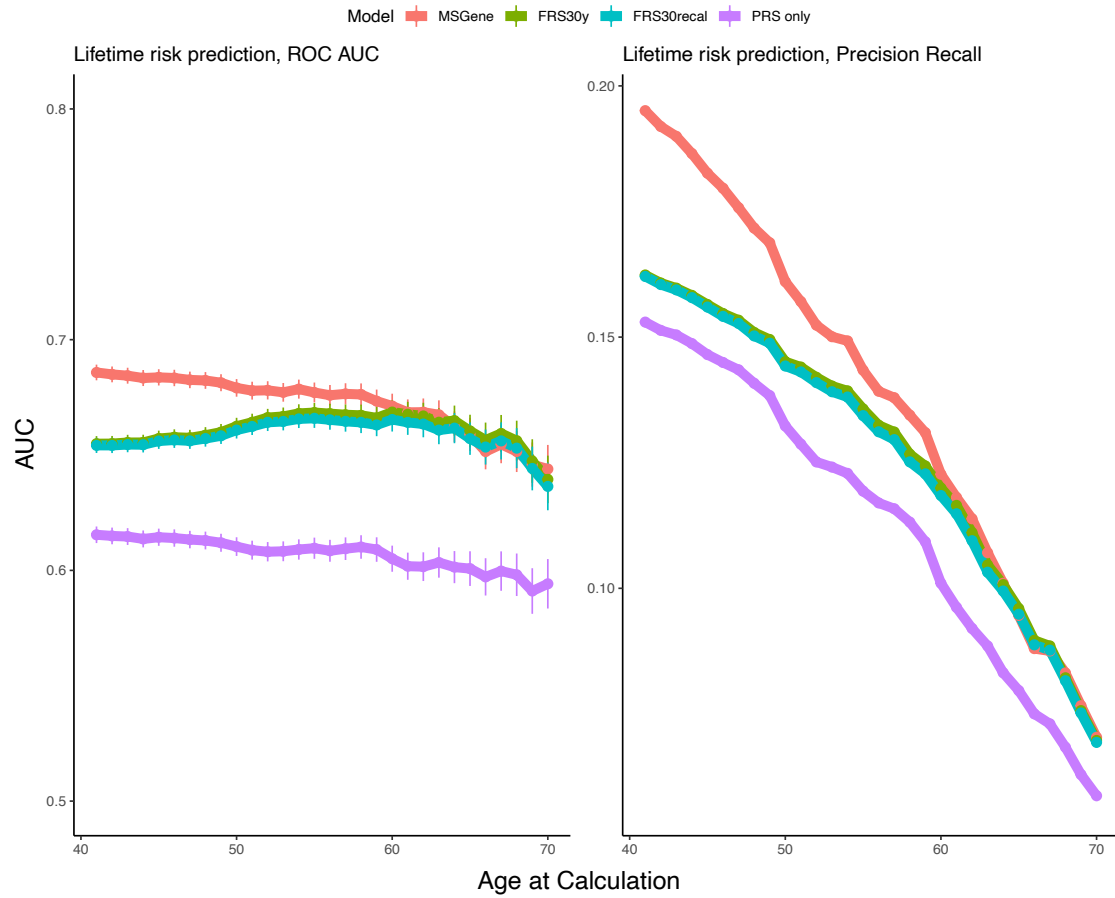

247

248 **Supplementary Figure 6.**

249

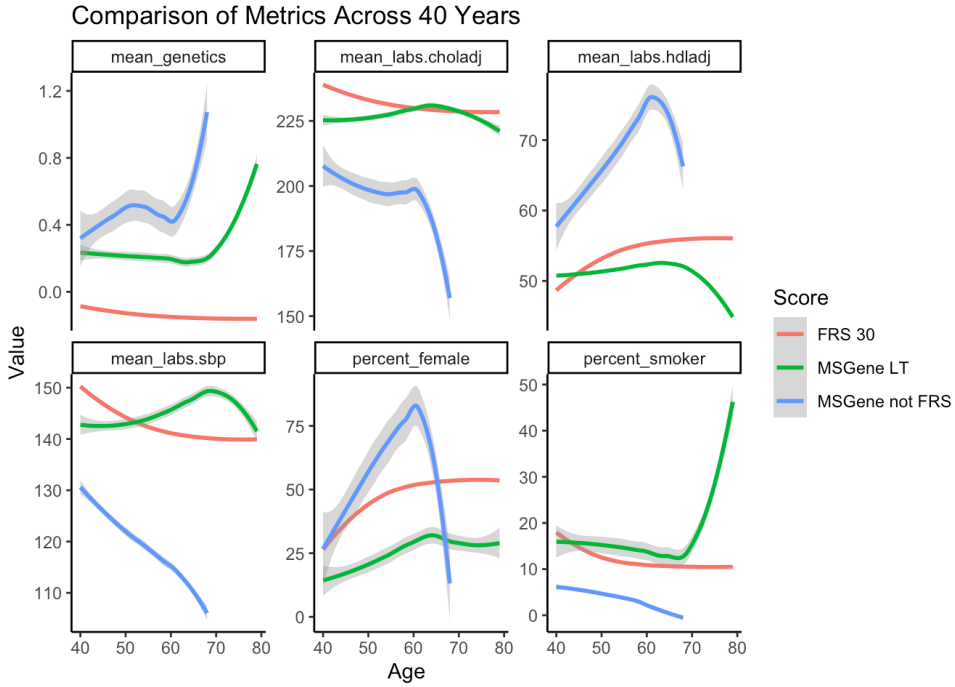

250 A.

251

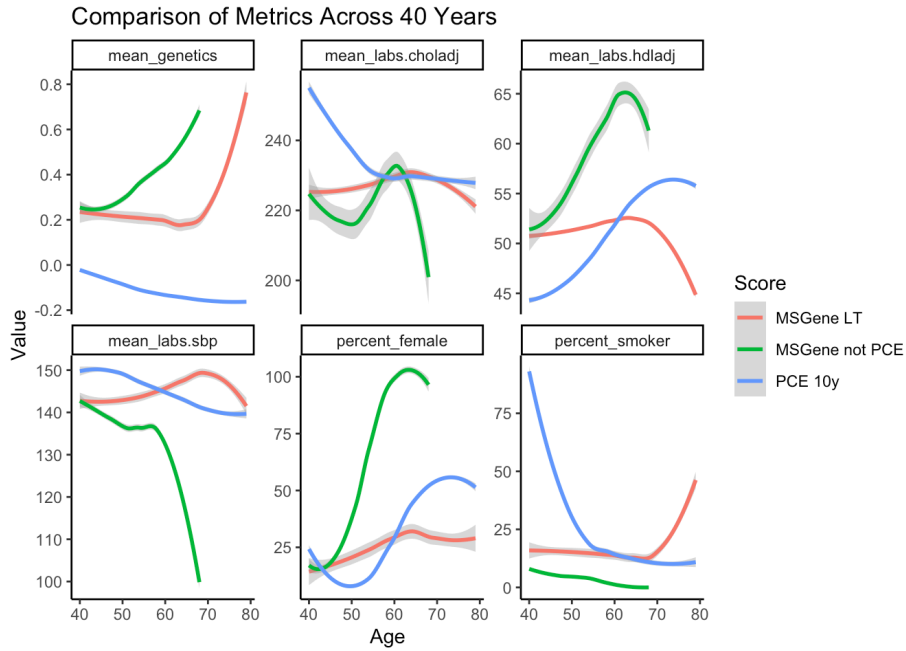

252

253 B.

254 **Supplementary Figure 7.**

255

256

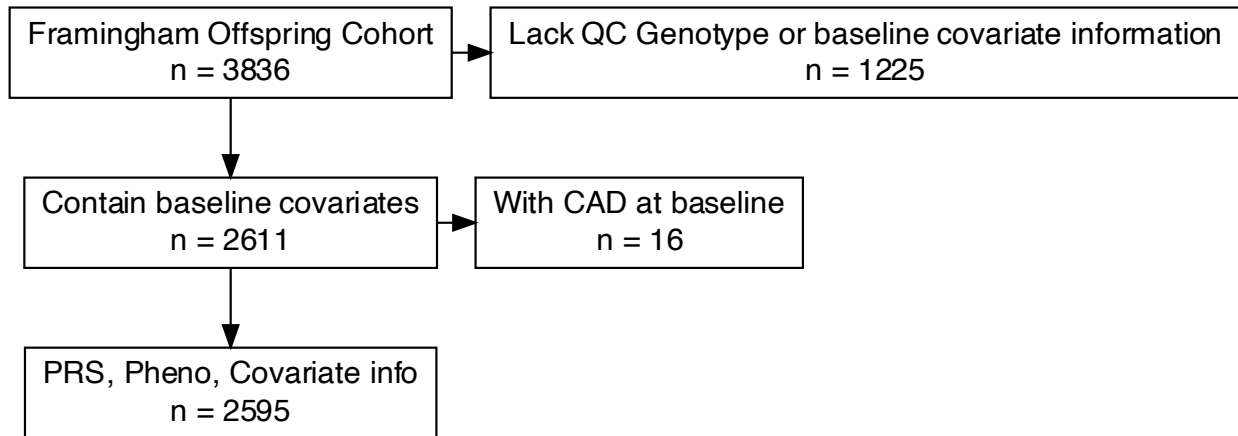

257  
258  
259

B.

|                                   | Low Genomic Risk<br>(N=506) | Intermediate Genomic Risk<br>(N=1575) | High Genomic Risk<br>(N=514) | Overall<br>(N=2595) |
|-----------------------------------|-----------------------------|---------------------------------------|------------------------------|---------------------|
| <b>Sex</b>                        |                             |                                       |                              |                     |
| Female Number (%)                 | 266 (52.6%)                 | 822 (52.2%)                           | 282 (54.9%)                  | 1370 (52.8%)        |
| Male Number (%)                   | 240 (47.4%)                 | 753 (47.8%)                           | 232 (45.1%)                  | 1225 (47.2%)        |
| <b>Age of First Measured</b>      |                             |                                       |                              |                     |
| Median [IQR]                      | 34.0 [27.0, 42.0]           | 33.0 [27.0, 41.0]                     | 34.0 [28.0, 41.0]            | 33.0 [27.0, 41.0]   |
| <b>Develop Hypertension</b>       |                             |                                       |                              |                     |
| Mean (SD)                         | 0.279 (0.449)               | 0.331 (0.471)                         | 0.358 (0.480)                | 0.326 (0.469)       |
| <b>Develop Coronary Disease</b>   |                             |                                       |                              |                     |
| Number (Percent)                  | 66 (13.0%)                  | 261 (16.6%)                           | 151 (29.4%)                  | 478 (18.4%)         |
| <b>Develop Hyperlipidemia</b>     |                             |                                       |                              |                     |
| Mean (SD)                         | 0.818 (0.386)               | 0.841 (0.366)                         | 0.891 (0.312)                | 0.847 (0.360)       |
| <b>Start an anti-Hypertensive</b> |                             |                                       |                              |                     |
| Mean (SD)                         | 0.532 (0.499)               | 0.630 (0.483)                         | 0.689 (0.463)                | 0.623 (0.485)       |
| <b>Current Smoker</b>             |                             |                                       |                              |                     |
| Mean (SD)                         | 0.362 (0.481)               | 0.413 (0.493)                         | 0.416 (0.493)                | 0.404 (0.491)       |
| <b>Years Followed</b>             |                             |                                       |                              |                     |
| Mean (SD)                         | 36.8 (4.80)                 | 36.6 (5.12)                           | 36.5 (5.18)                  | 36.6 (5.07)         |
| Median [Min, Max]                 | 38.4 [13.3, 42.1]           | 38.2 [11.8, 42.3]                     | 38.3 [12.7, 42.3]            | 38.3 [11.8, 42.3]   |

260  
261  
262  
263

Supplementary Figure 8.

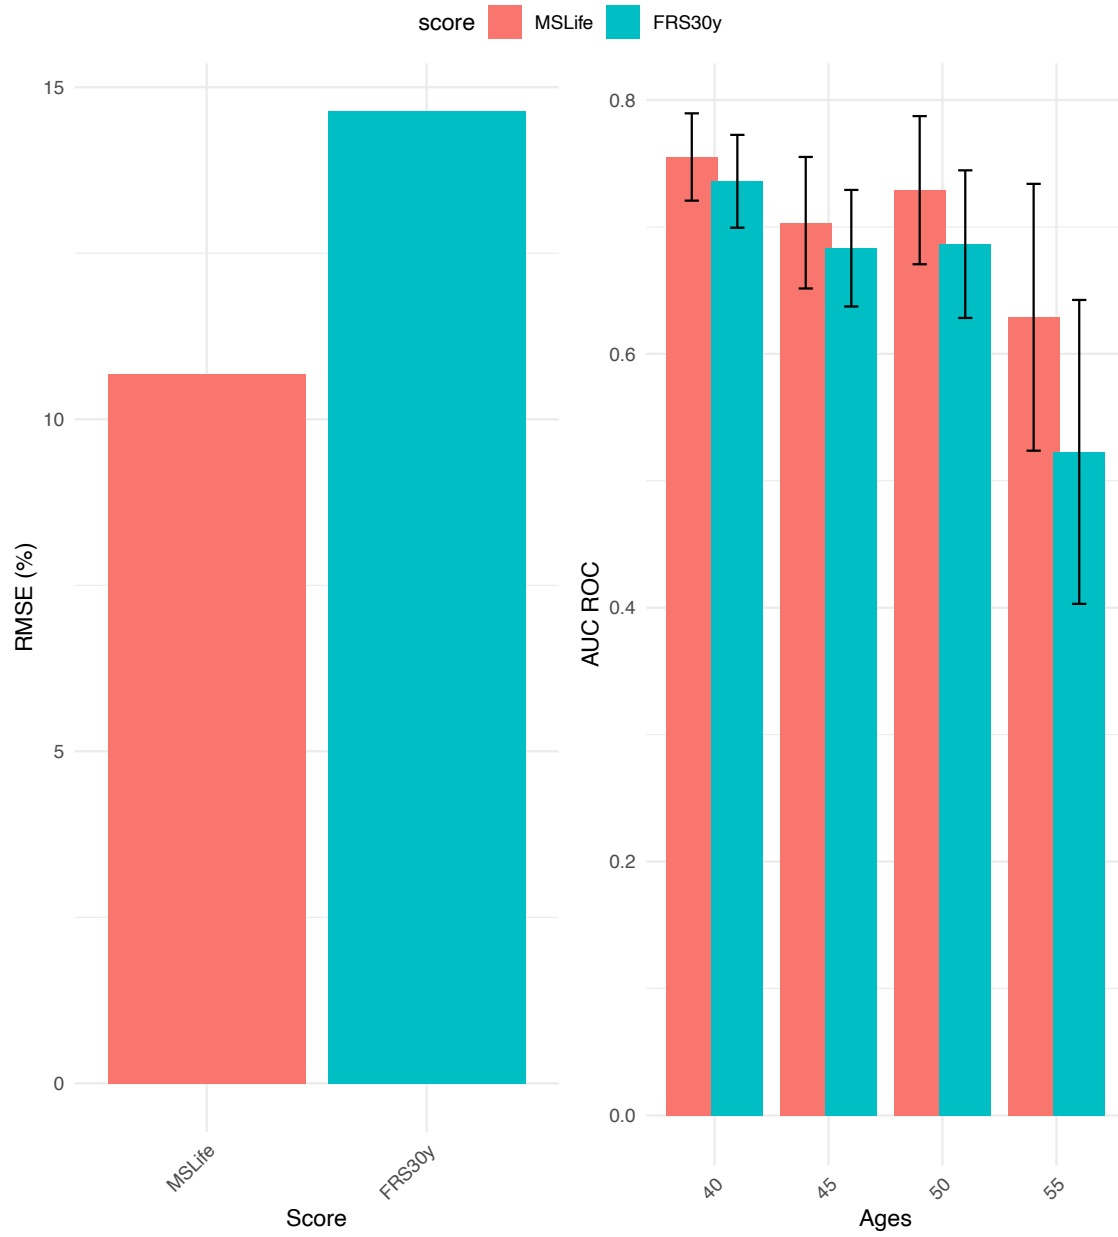

264  
265  
266

**Supplementary Figure 9.**

# Risk Prediction App

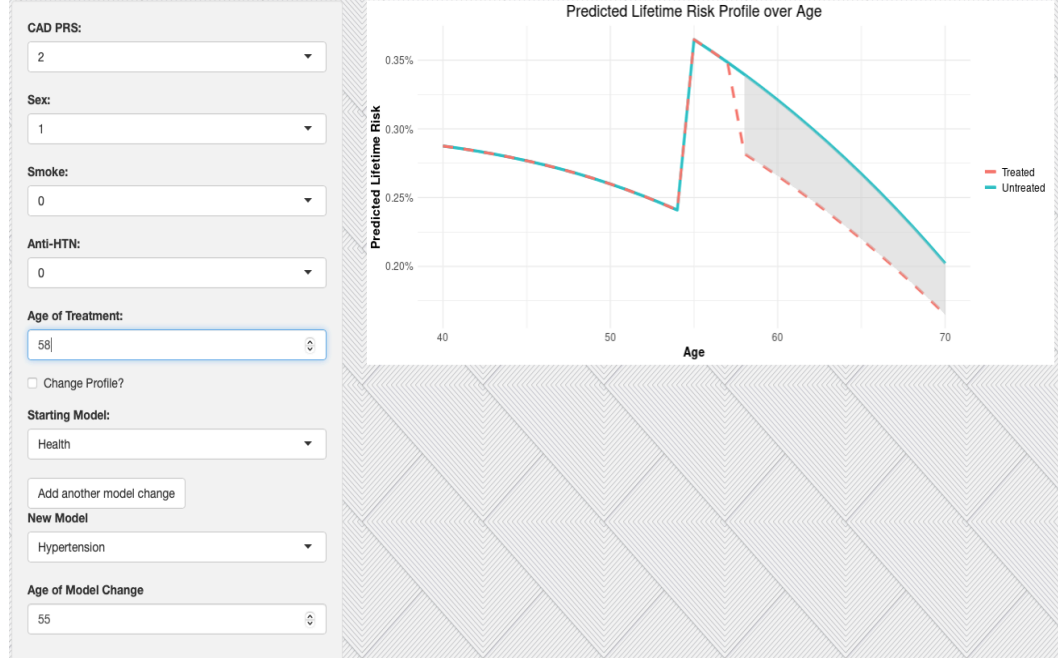

267  
268

269 **Supplementary Figure 10.**



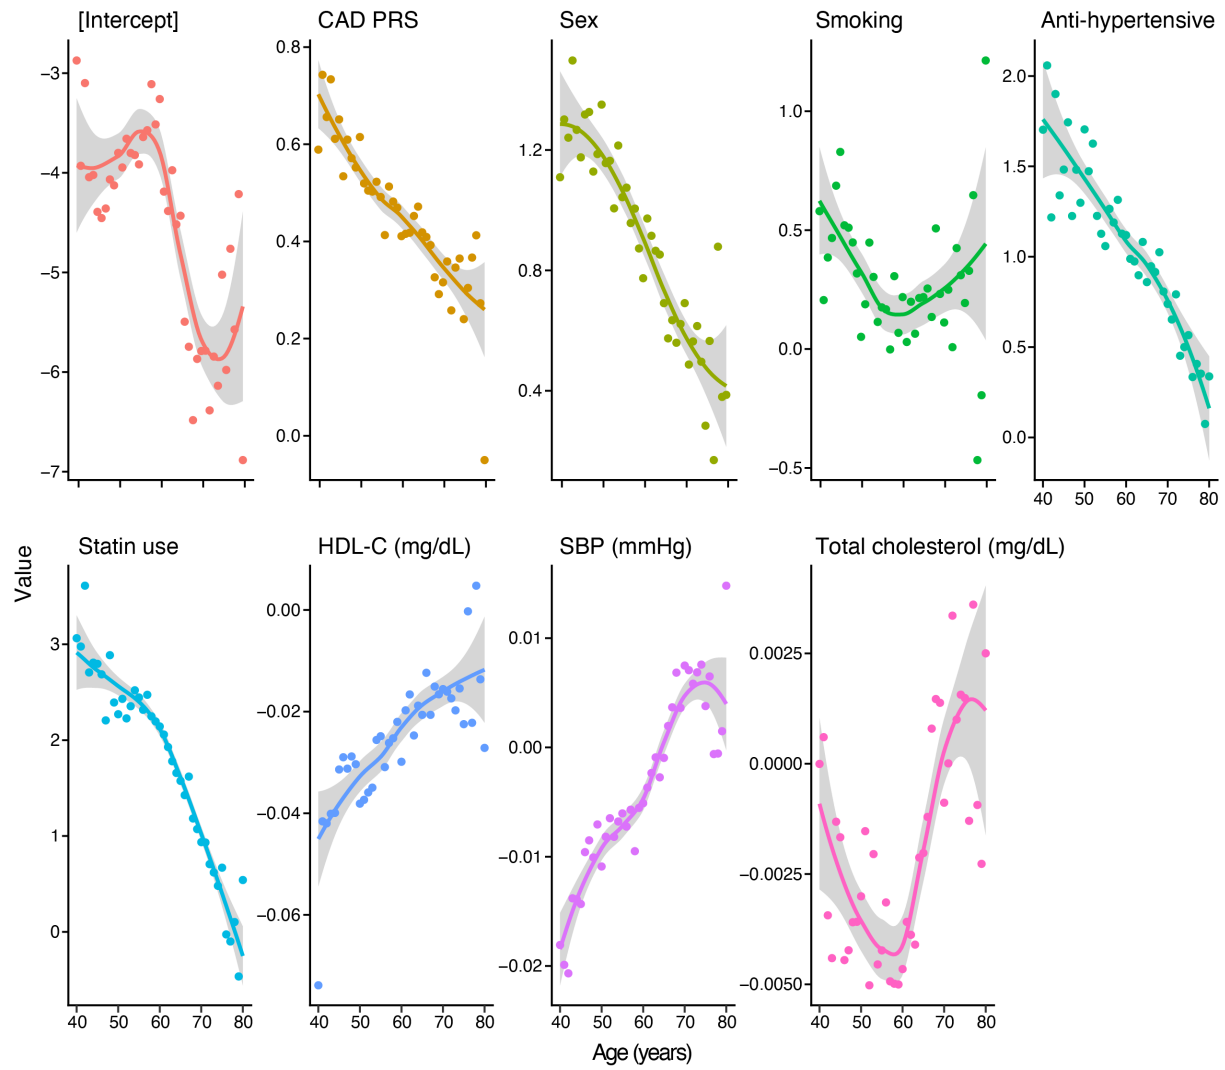

270  
271  
272  
273

**Supplementary Figure 11.**

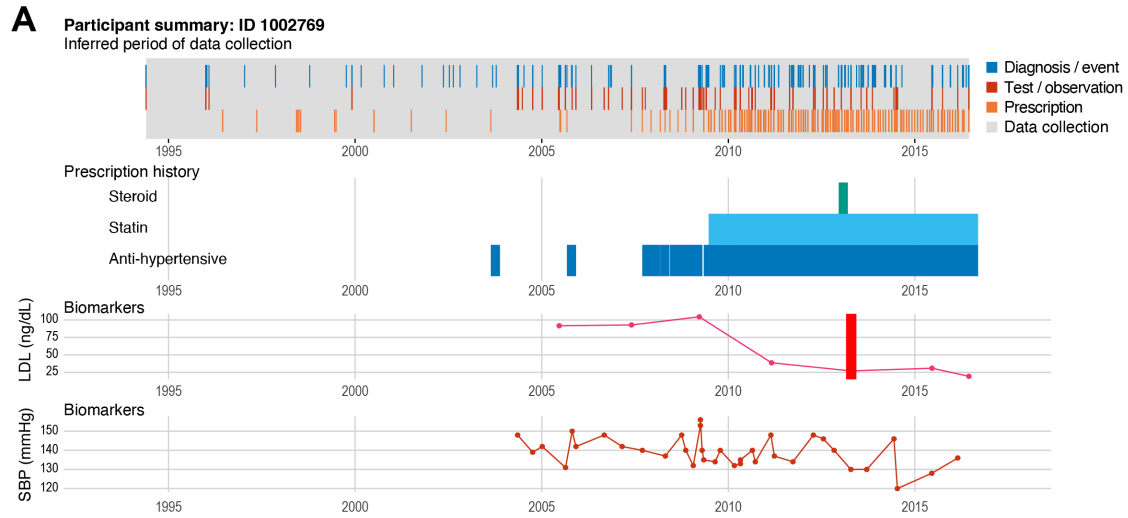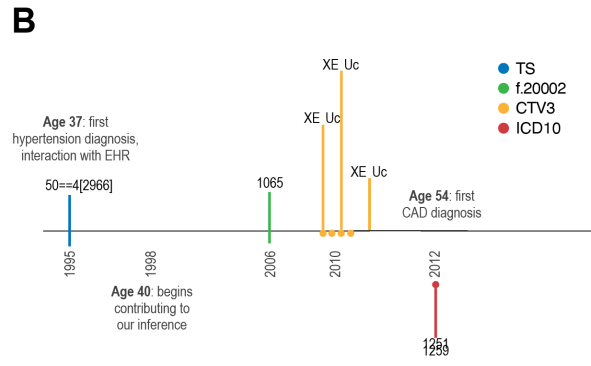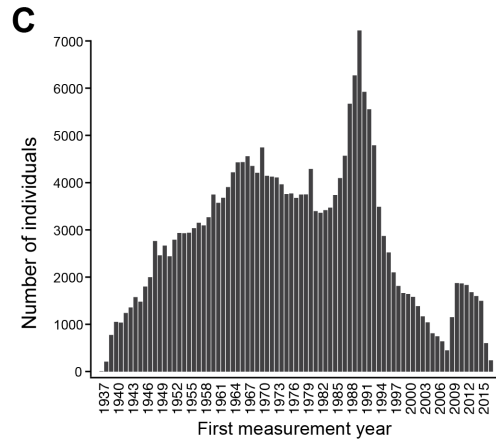

274  
275

276

277 **Supplementary Figure 12.**

278

279

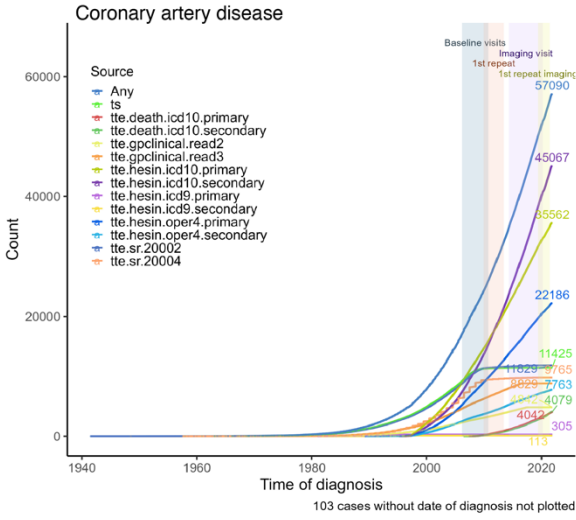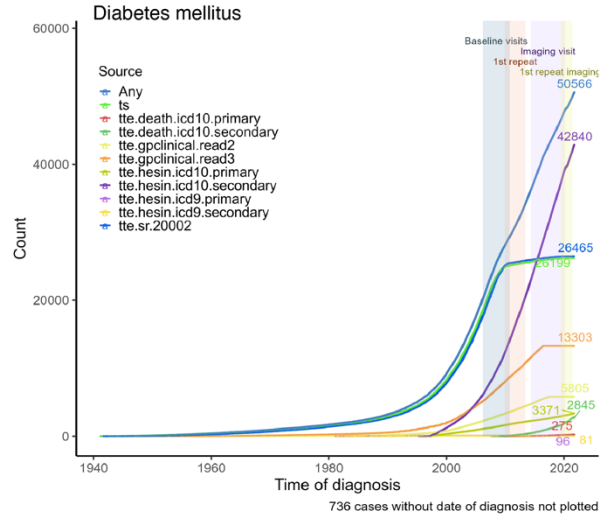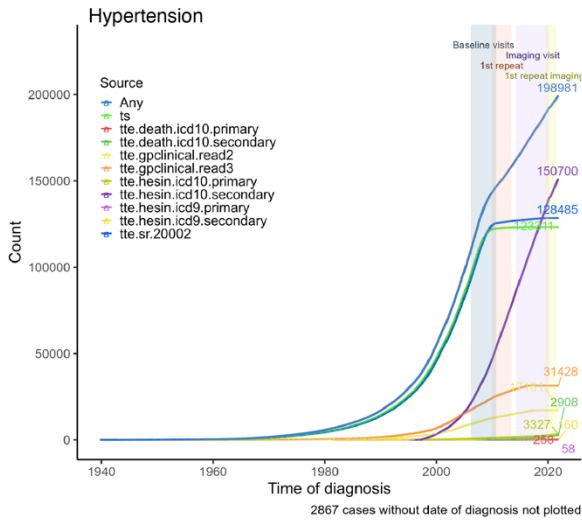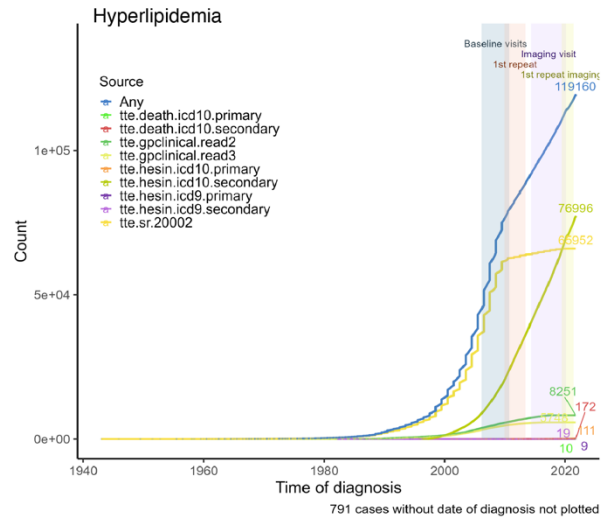

280  
281  
282  
283  
284

Supplementary Figure 13.

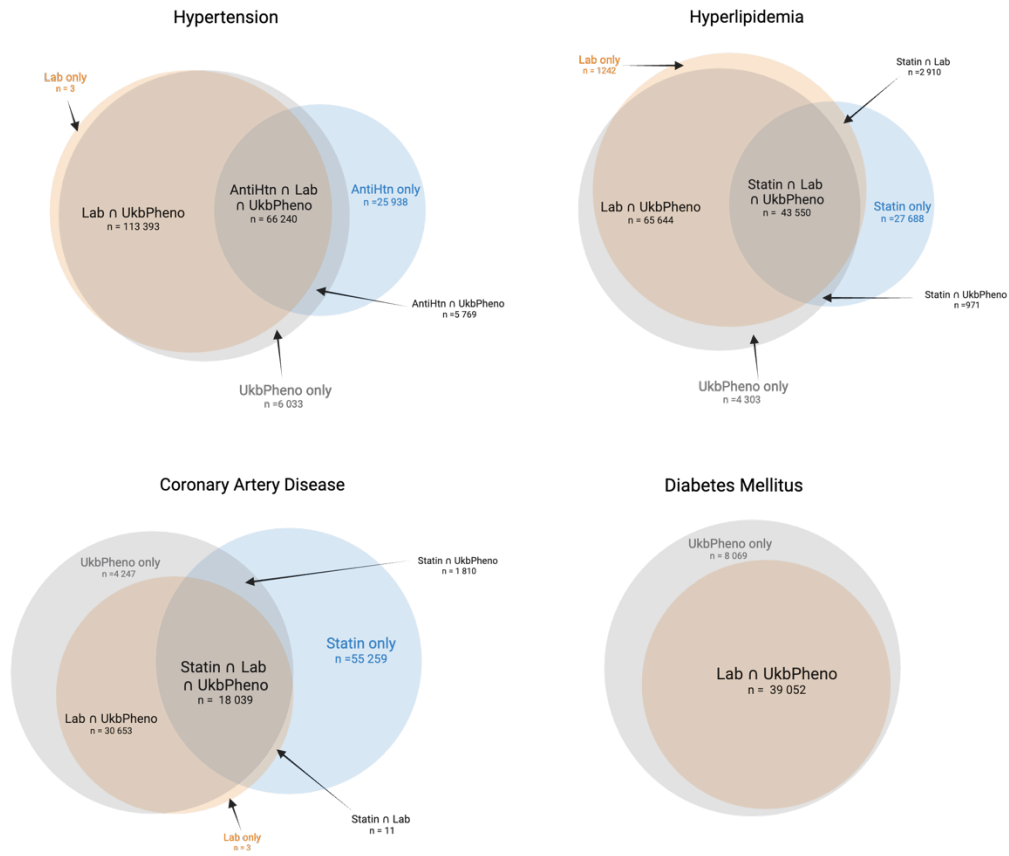

285  
 286 **Supplementary Figure 14.**  
 287  
 288

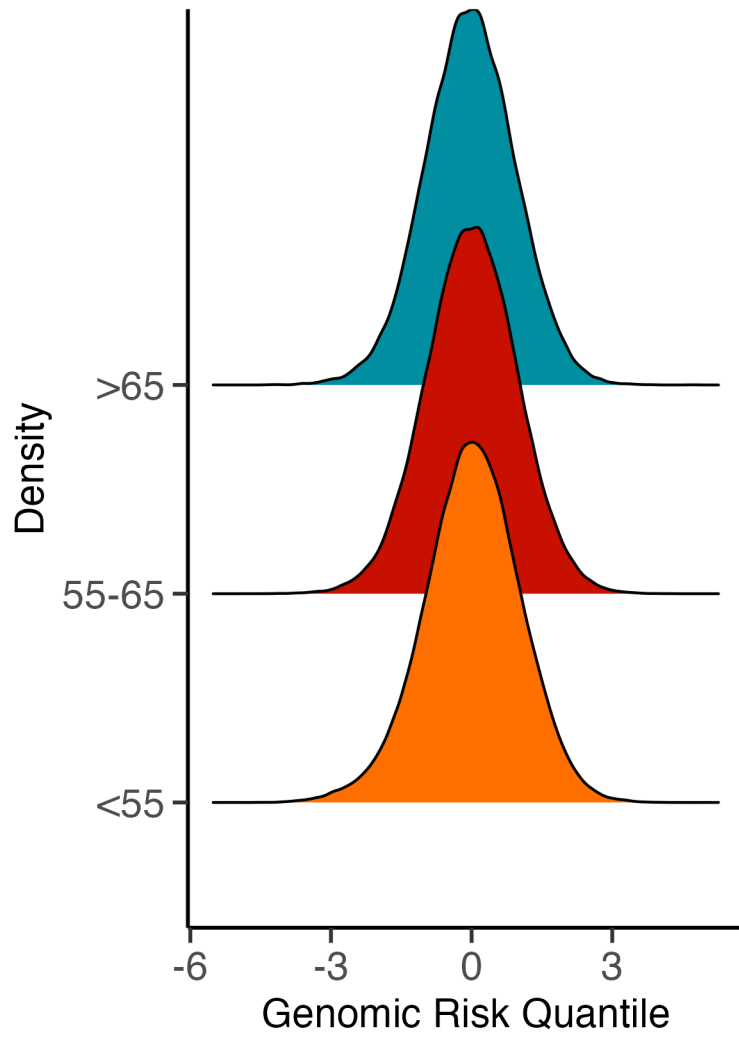

289  
290  
291

**Supplementary Figure 15.**

Start:

Stop:

Window Width:

Span:

Polynomial Degree:

Show Points:

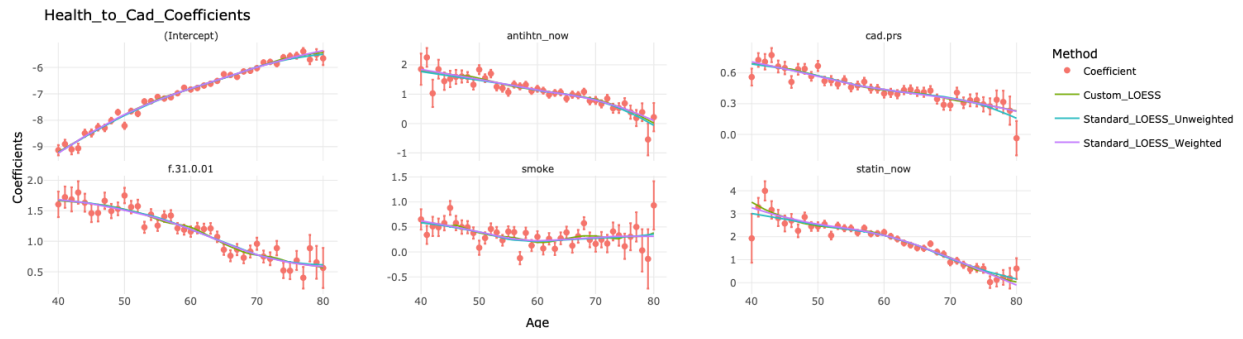

292  
293  
294  
295  
296  
297  
298  
299

**Supplementary Figure 16.**

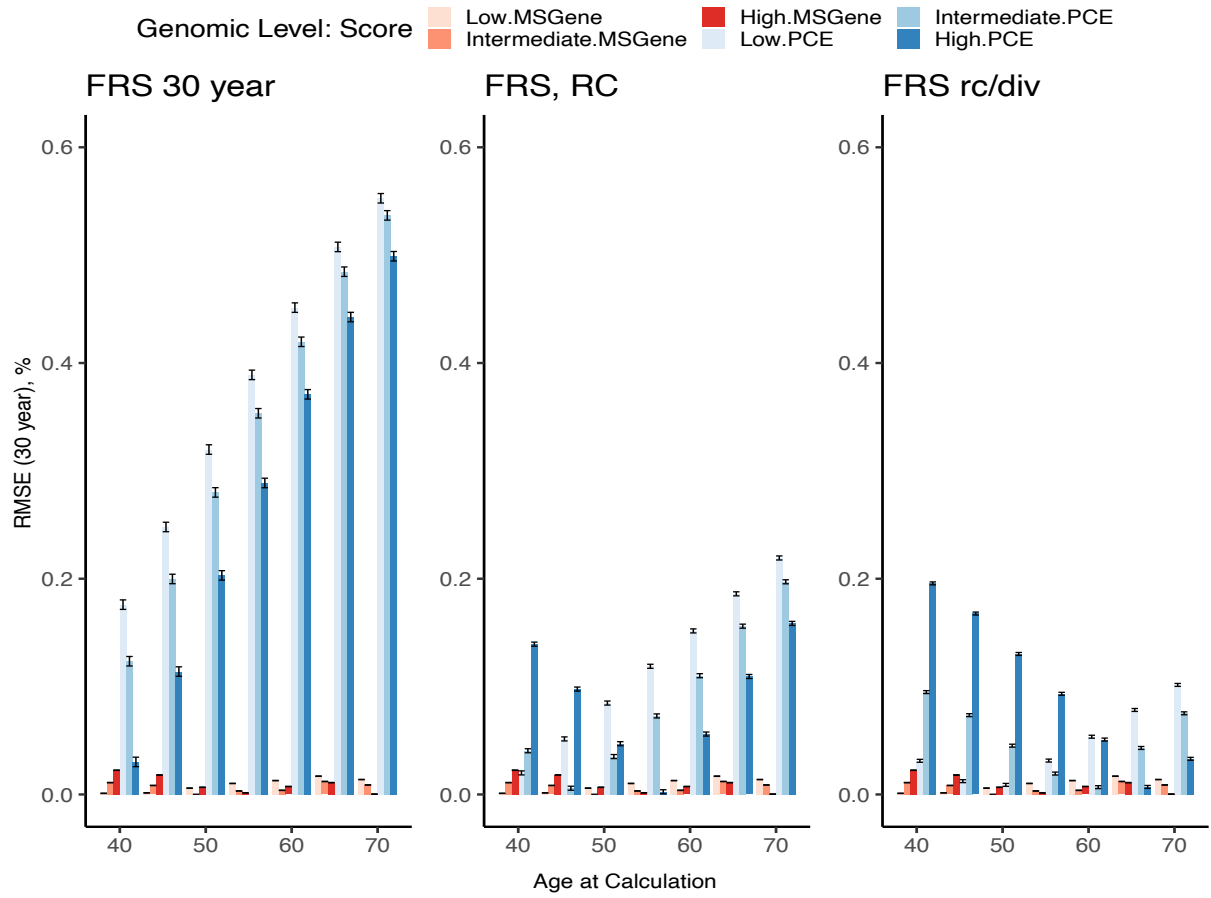

300  
301  
302  
303

**Supplementary Figure 17.**

304 Additional Supplementary Materials  
305

- 306 1. Excel Tables 2-17: Risks2-17Urbutetal.xls
- 307 2. MSGene **App**: <https://surbut.shinyapps.io/risk/>
- 308 3. MSGene smoothing interface: <https://surbut.shinyapps.io/testapp/>
- 309 4. GitHub Code for MSGene model:  
310 <https://github.com/surbut/MSGene>
- 311 5. GitHub Vignettes:  
312 <https://surbut.github.io/MSGene/usingMarginal.html>  
313 <https://surbut.github.io/MSGene/vignette.html>  
314
